# Supplementary material
Source: PubMed Central journal article supplement (PMC5595065)

# Supp 1

A

MnCl<sub>2</sub> 500  $\mu$ M

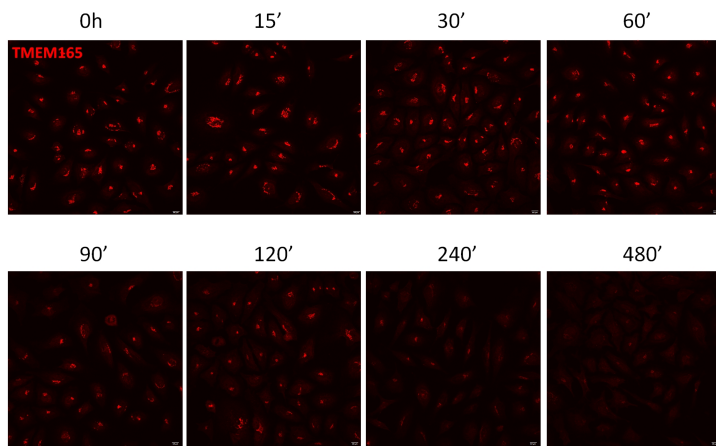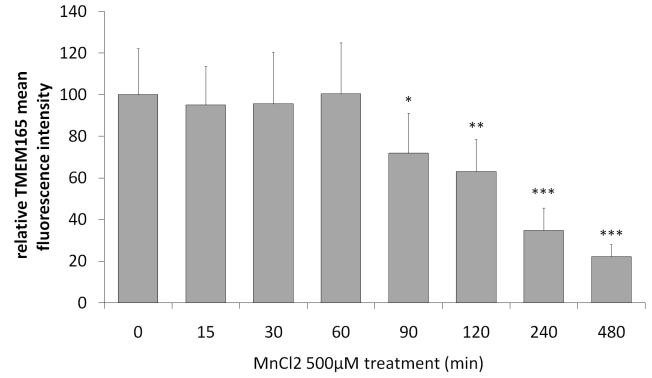

B

MnCl<sub>2</sub>

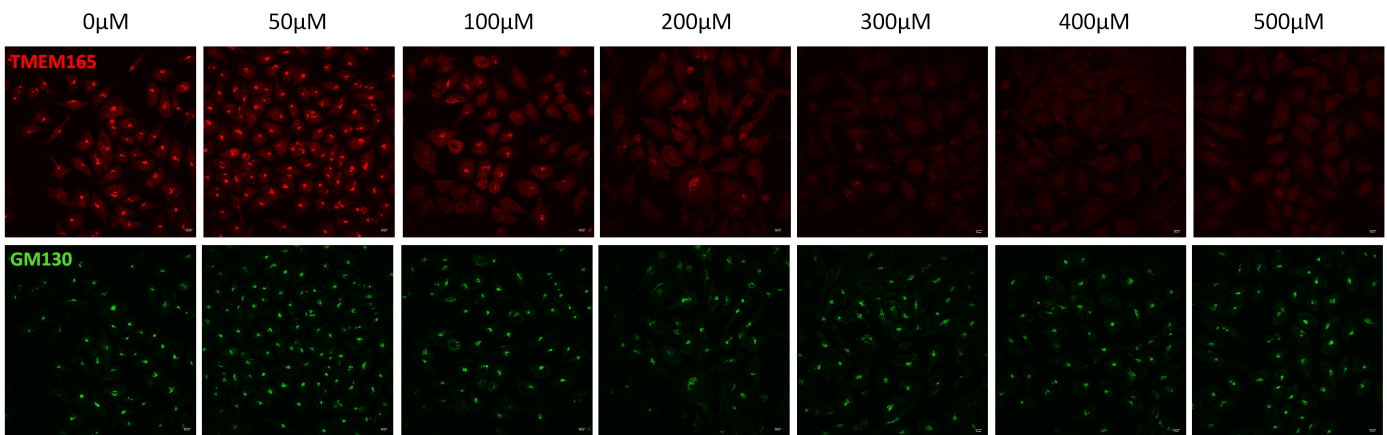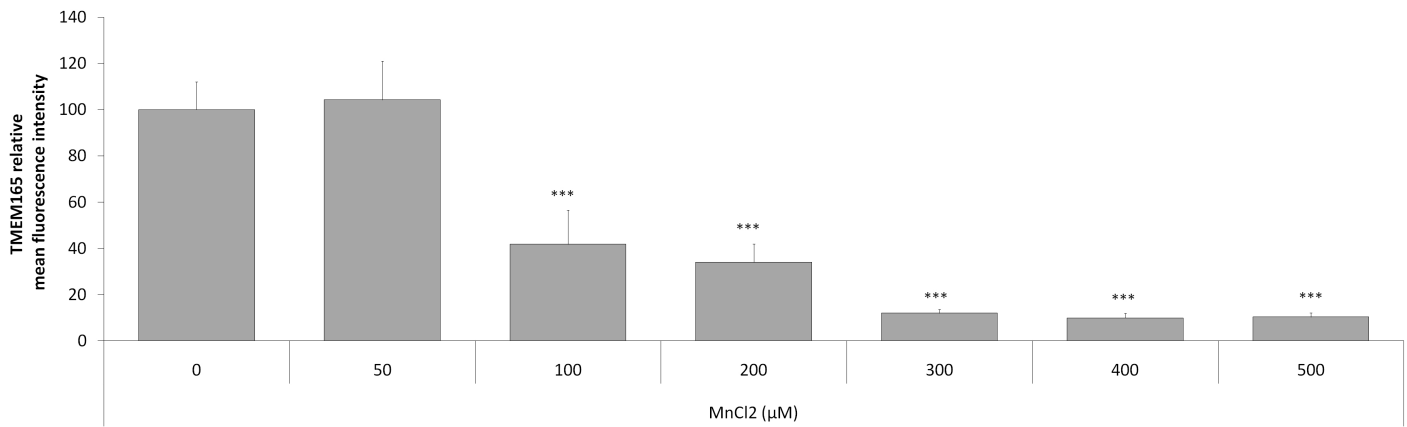

Supplement: NIHMS903438-supplement-supplement_1.pdf [file NIHMS903438-supplement-supplement_1.pdf]
